# Supplementary material for: Determination of sulfonamide antibiotics in forage grasses by an improved QuEChERS and multi-plug filtration cleanup method combined with UHPLC-MS/MS
Source: Royal Society of Chemistry journal article supplement (doi:10.1039/d4ra04330h), 2024-01-01
Supplement: d4ra04330h1.pdf [file d4ra04330h1.pdf]

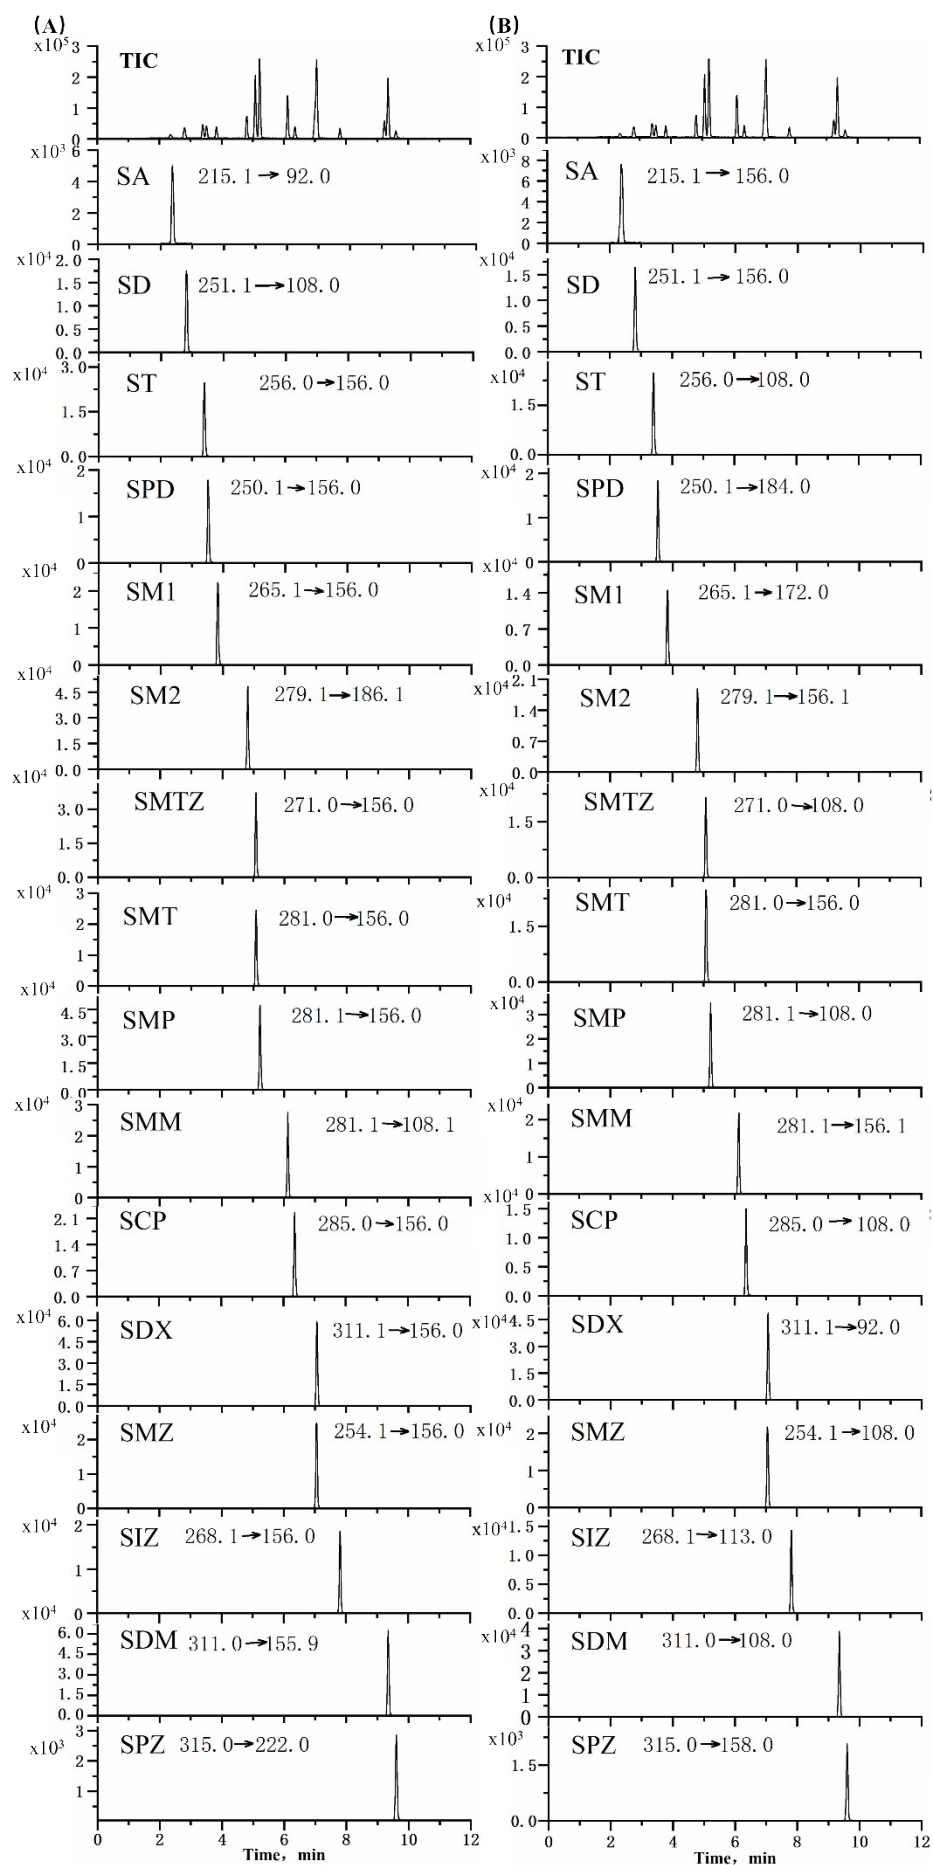

Fig.1. The selective ion chromatograms for each sulfonamide of blank forage grasses matrix spiked at 20  $\mu\text{g/L}$ . The A represents a quantitative ion pair chromatogram, while B denotes a qualitative ion pair chromatogram.

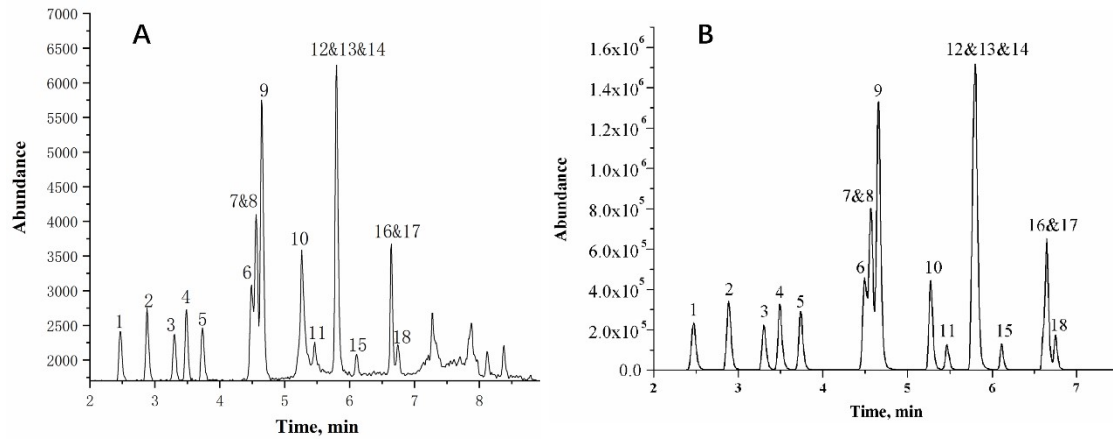

Fig.2. The total ion flow chromatogram of LOD (0.1  $\mu\text{g/kg}$ , A) and a standard solution with a concentration of 20  $\mu\text{g/L}$  (B).
